# Supplementary material for: Nitric oxide generation study of unsymmetrical β-diketiminato copper(ii) nitrite complexes
Source: Royal Society of Chemistry journal article supplement (doi:10.1039/d1dt03711k), 2022-01-01
Supplement: d1dt03711k1.pdf [file d1dt03711k1.pdf]

Electronic supplementary information for

## Nitric oxide generation activity from unsymmetrical $\beta$ -diketiminato copper(II) nitrite complexes

Kuldeep Chand,<sup>a</sup> Yu-Cheng Chu,<sup>a</sup> Tzai-Wei Wang,<sup>c</sup> Chai-Lin Kao,<sup>a</sup> Ya-Fan Lin,<sup>a, b\*</sup> Ming-Li Tsai,<sup>a, c\*</sup>  
Sodio C. N. Hsu<sup>a, c, d\*</sup>

<sup>a</sup>Department of Medicinal and Applied Chemistry, Drug Development and Value Creation Research Center, Kaohsiung Medical University, Kaohsiung 807, Taiwan

<sup>b</sup>Department of Fragrance and Cosmetic Science, Kaohsiung Medical University, Kaohsiung 807, Taiwan

<sup>c</sup>Department of Chemistry, National Sun Yat-Sen University, Kaohsiung 804, Taiwan.

<sup>d</sup>Department of Medical Research, Kaohsiung Medical University Hospital, Kaohsiung 807, Taiwan.

### Contents

**Fig. S1** (a) FT-IR spectra (KBr pellet) of complexes  $L_1Cu(O_2^{14}N)$  (black) with  $L_1Cu(O_2^{15}N)$  (red) and (b)  $L_2Cu(O_2^{14}N)$  (black) with  $L_2Cu(O_2^{15}N)$  (red).

**Fig. S2** CV diagrams of  $L_1CuCl$  (a),  $L_2CuCl$  (b),  $L_3CuCl$  (c), and  $L_4CuCl$  (d) in MeCN.

**Fig. S3** CV diagrams of  $L_1Cu(O_2N)$  (a) and  $L_2Cu(O_2N)$  (b) in MeCN.

**Fig. S4** Absorption spectra of complexes  $L_1CuCl$  (a),  $L_2CuCl$  (b) and  $L_1Cu(O_2N)$  (c),  $L_2Cu(O_2N)$  (d) in  $CH_2Cl_2$  at room temperature.

**Fig. S5** Experimental (black) and simulated (red) EPR spectra of  $L_1CuCl$  (a),  $L_2CuCl$  (b),  $L_3CuCl$  (c), and  $L_4CuCl$  (d).

**Fig. S6** Experimental (black) and simulated (red) EPR spectra of  $L_1Cu(O_2N)$  (a) and  $L_2Cu(O_2N)$  (b).

**Fig. S7** The spin density distributions of  $L_1CuCl$  (a) and  $L_2CuCl$  (b), respectively.

**Fig. S8** Comparison of  $^1H$  NMR spectrum (400 MHz,  $C_6D_6$ ) of  $L_1Cu(O_2N)$  with (a) two and (b) three equivalents of  $PPh_3$ .

**Fig. S9** Comparison of  $^1H$  NMR spectrum (400 MHz,  $C_6D_6$ ) of  $L_2Cu(O_2N)$  with (a) two and (b) three equivalents of  $PPh_3$ .

**Fig. S10**  $^{31}\text{P}$  NMR spectrum (400 MHz,  $\text{C}_6\text{D}_6$ ) of  $\text{L}_1\text{Cu}(\text{O}_2\text{N})$  with two equivalents of  $\text{PPh}_3$ .

**Fig. S11**  $^{31}\text{P}$  NMR spectrum (400 MHz,  $\text{C}_6\text{D}_6$ ) of  $\text{L}_1\text{Cu}(\text{O}_2\text{N})$  with three equivalents of  $\text{PPh}_3$ .

**Fig. S12**  $^{31}\text{P}$  NMR spectrum (400 MHz,  $\text{C}_6\text{D}_6$ ) of  $\text{L}_2\text{Cu}(\text{O}_2\text{N})$  with two equivalents of  $\text{PPh}_3$ .

**Fig. S13**  $^{31}\text{P}$  NMR spectrum (400 MHz,  $\text{C}_6\text{D}_6$ ) of  $\text{L}_2\text{Cu}(\text{O}_2\text{N})$  with three equivalents of  $\text{PPh}_3$ .

**Fig. S14** UV-Vis. spectra (in  $\text{CH}_2\text{Cl}_2$  at 25 °C) of (TPP)Co (Black trace) and (TPP)Co(NO) species generated upon reacting (TPP)Co with NO released from the mixture of  $\text{L}_1\text{Cu}(\text{O}_2\text{N})$ (blue),  $\text{L}_2\text{Cu}(\text{O}_2\text{N})$ (red) and  $\text{PPh}_3$ .

**Fig. S15** a) UV-vis spectra showing the shift in absorbance band of cobalt(II) porphyrin (TPP)Co(II) (TPP= tetraphenylporphyrin) with increasing level of complexation to NO. b) Calibration curve extracted from the peak maxima, showing the linear trend in absorption maximum shift with % complexation to NO. The spectra show  $\text{L}_1\text{Cu}(\text{O}_2\text{N})$  (red) and  $\text{L}_2\text{Cu}(\text{O}_2\text{N})$  (blue).

**Fig. S16** CV diagrams of  $\text{L}_1\text{Cu}(\text{O}_2\text{N})$  (a) and  $\text{L}_2\text{Cu}(\text{O}_2\text{N})$  (b) after  $\text{PPh}_3$  addition.

**Fig. S17** CV diagram of dissolved NO(g) with various concentration in  $\text{CH}_3\text{CN}$  solution.

**Fig. S18** Standardization plot of NO(g).

**Fig. S19** Reaction of  $\text{L}_1\text{Cu}(\text{O}_2\text{N})$  with excess of  $\text{PPh}_3$  (25~50 equivalents) in  $\text{CH}_2\text{Cl}_2$  at 25 °C.

**Fig. S20** Reaction of  $\text{L}_1\text{Cu}(\text{O}_2\text{N})$  with excess of  $\text{PPh}_3$  (25~50 equivalents) in  $\text{CH}_2\text{Cl}_2$  at 25 °C.

**Fig. S21** Eyring plot for the reaction of  $\text{L}_1\text{Cu}(\text{O}_2\text{N})$  with two equivalents of  $\text{PPh}_3$ .

**Fig. S22** Eyring plot for the reaction of  $\text{L}_2\text{Cu}(\text{O}_2\text{N})$  with two equivalents of  $\text{PPh}_3$ .

**Table S1** The experimental and calculated metric parameters of  $\text{L}_1\text{CuCl}$  and  $\text{L}_2\text{CuCl}$ .

**Table S2** The overlap population analysis between Cu and coordinated donor atoms for the  $\beta$ -LUMOs of  $\text{L}_1\text{CuCl}$  and  $\text{L}_2\text{CuCl}$ .

**Table S3** First order rate constants for reaction of copper(II) nitrito complexes (2 mM) with triphenylphosphine (4 mM) in  $\text{CH}_2\text{Cl}_2$  at 278-308 K.

**Table S4** Values of  $E_{1/2}$  for Cu(II) complexes.

**Table S5** DFT optimized result: atomic coordinates of  $\text{L}_1\text{CuCl}$ .

**Table S6** DFT optimized result: atomic coordinates of  $\text{L}_2\text{CuCl}$ .

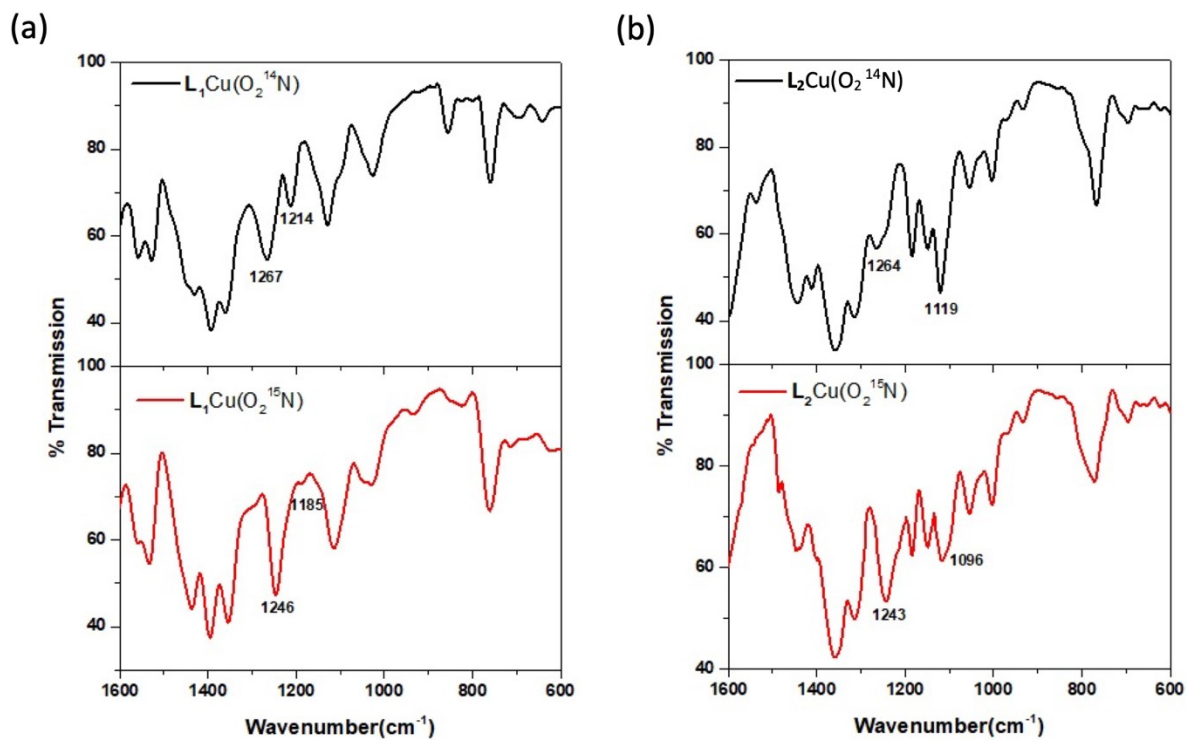

**Fig. S1.** (a) FT-IR spectra (KBr pellet) of complexes **L<sub>1</sub>Cu(O<sub>2</sub><sup>14</sup>N)** (black) with **L<sub>1</sub>Cu(O<sub>2</sub><sup>15</sup>N)** (red) and (b) **L<sub>2</sub>Cu(O<sub>2</sub><sup>14</sup>N)** (black) with **L<sub>2</sub>Cu(O<sub>2</sub><sup>15</sup>N)** (red).

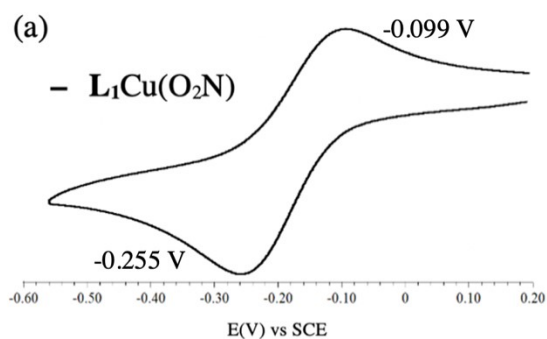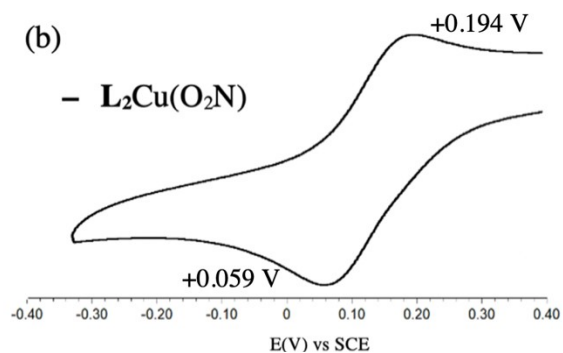

**Fig. S2** CV diagrams of  $L_1CuCl$  (a),  $L_2CuCl$  (b),  $L_3CuCl$  (c), and  $L_4CuCl$  (d) in MeCN ( $1 \times 10^{-3}$  M). Scan rate =  $300 \text{ mV s}^{-1}$ , electrolyte =  $(Bu_4N)(PF_6)$  (0.1 M). Note: Potentials are vs SCE (Ferrocene/Ferrocenium couple in  $CH_3CN$  solution,  $E_{1/2} = +400 \text{ mV}$ ).

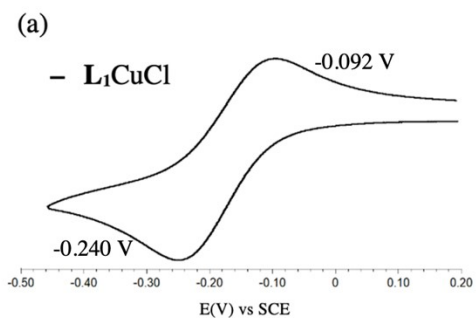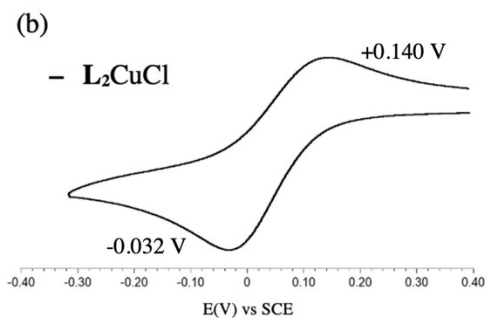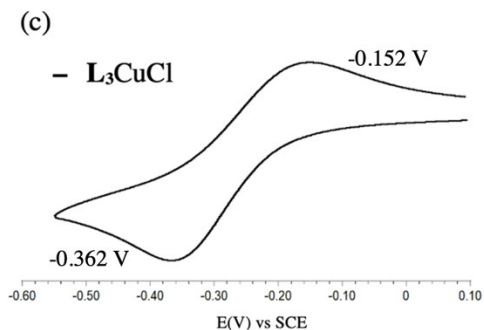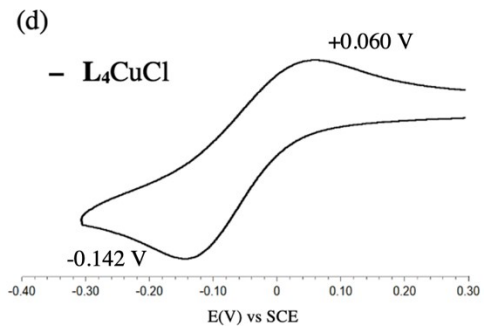

**Fig. S3** CV diagrams of  $L_1Cu(O_2N)$  (a) and  $L_2Cu(O_2N)$  (b) in MeCN ( $1 \times 10^{-3}$  M). Scan rate =  $300 \text{ mV s}^{-1}$ , electrolyte =  $(Bu_4N)(PF_6)$  (0.1 M). Note: Potentials are vs SCE (Ferrocene/Ferrocenium couple in  $CH_3CN$ )

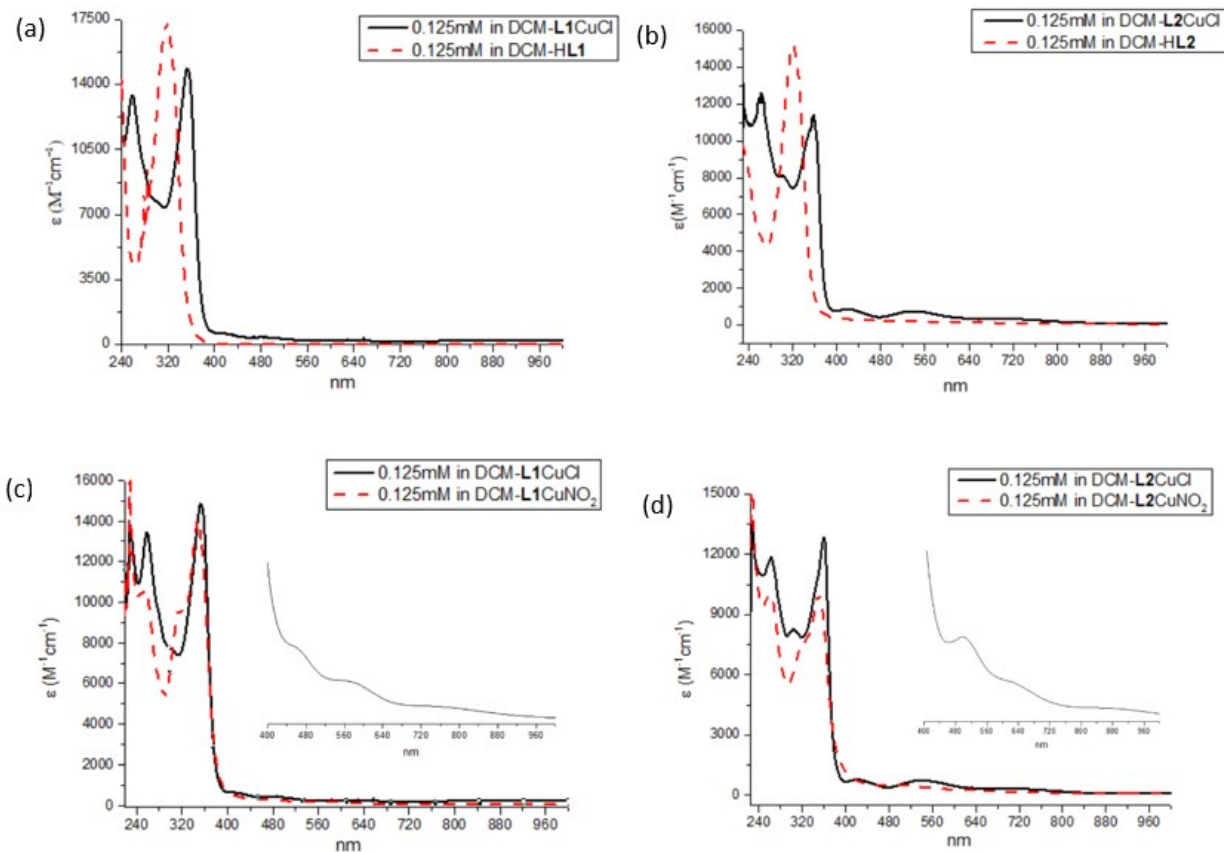

solution,  $E_{1/2} = +400 \text{ mV}$ ).

**Fig. S4.** Absorption spectra of complexes  $L_1CuCl$  (a),  $L_2CuCl$  (b) and  $L_1Cu(O_2N)$  (c),  $L_2Cu(O_2N)$  (d) in  $CH_2Cl_2$  at room temperature.

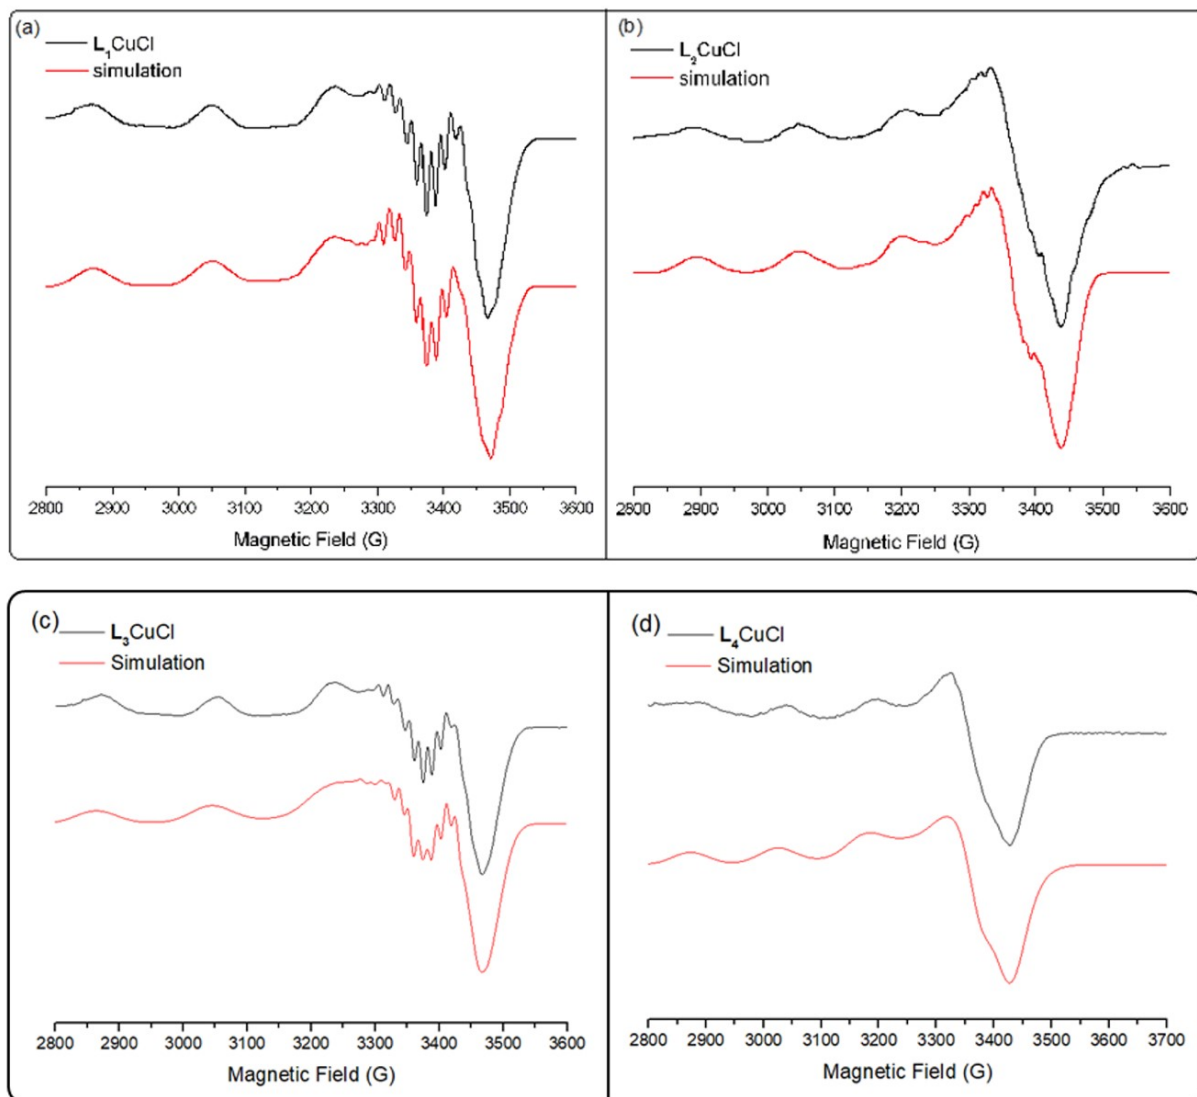

**Fig. S5** Experimental (black) and simulated (red) EPR spectra of  $L_1CuCl$  (a),  $L_2CuCl$  (b),  $L_3CuCl$  (c), and  $L_4CuCl$  (d).

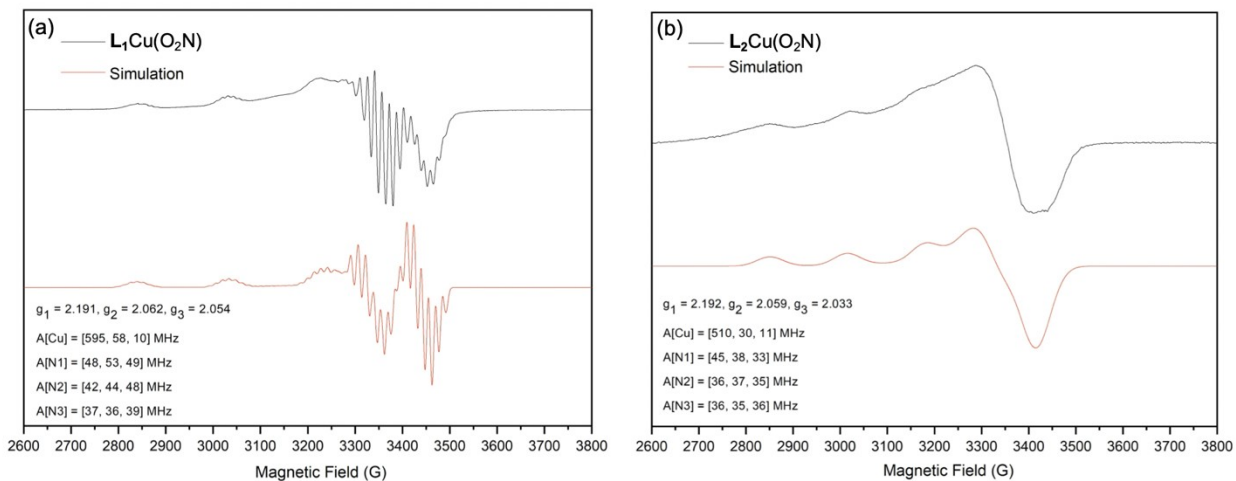

**Fig. S6** Experimental (black) and simulated (red) EPR spectra of **L<sub>1</sub>Cu(O<sub>2</sub>N)** (a) and **L<sub>2</sub>Cu(O<sub>2</sub>N)** (b). Note that the linewidth of simulation spectrum of **L<sub>1</sub>Cu(O<sub>2</sub>N)** was modeled by a combination of linewidth broaden function [3, 3, 2] MHz, g-strain [0.003, 0.002, 0.0028], and A-strain [2, 1.5, 1] MHz; the linewidth of simulation spectrum of **L<sub>2</sub>Cu(O<sub>2</sub>N)** was modeled by a combination of linewidth broaden function [3, 3, 2] MHz, g-strain [0.018, 0.018, 0.018], and A-strain [2, 1.5, 1] MHz.

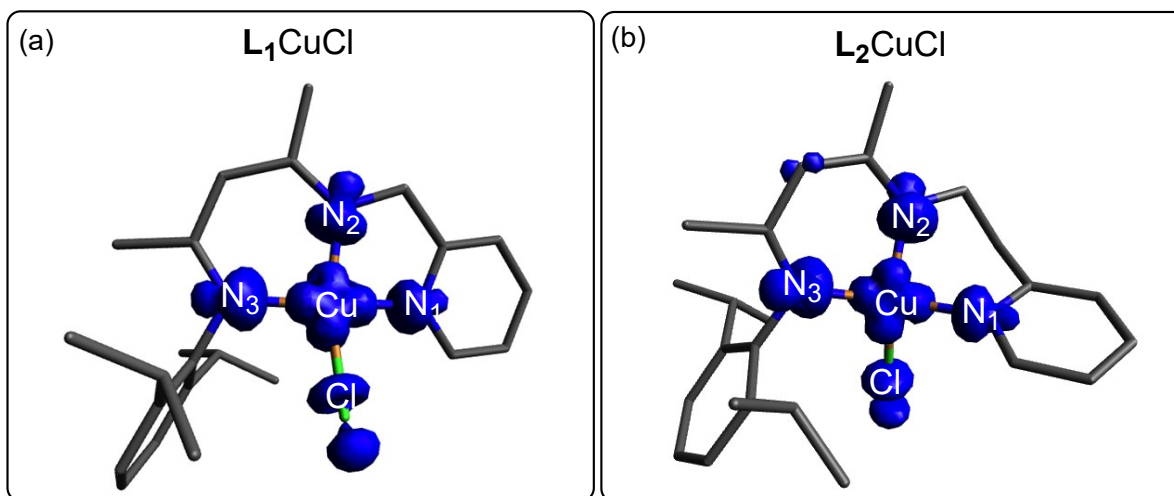

**Fig. S7** The spin density distributions of **L<sub>1</sub>CuCl** (a) and **L<sub>2</sub>CuCl** (b).

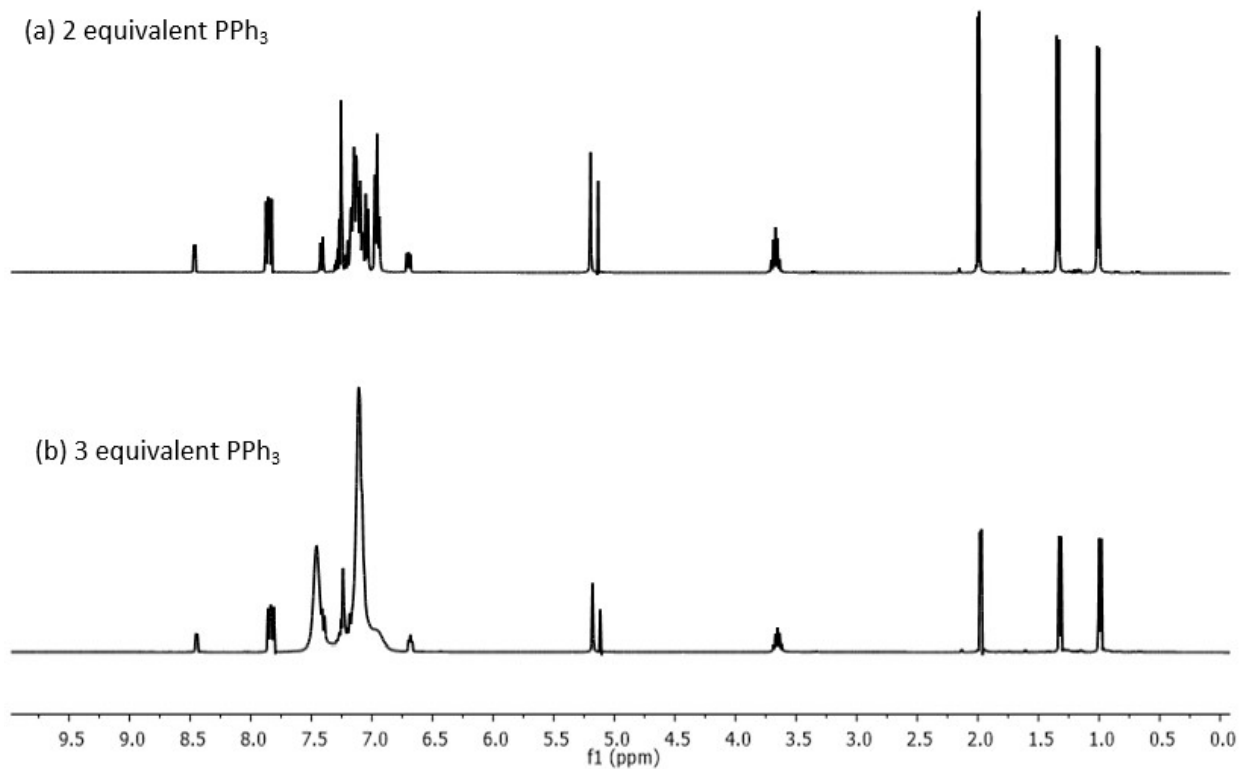

**Fig. S8** Comparison of <sup>1</sup>H NMR spectrum (400 MHz, C<sub>6</sub>D<sub>6</sub>) of L<sub>1</sub>Cu(O<sub>2</sub>N) with (a) two and (b) three equivalents of PPh<sub>3</sub>.



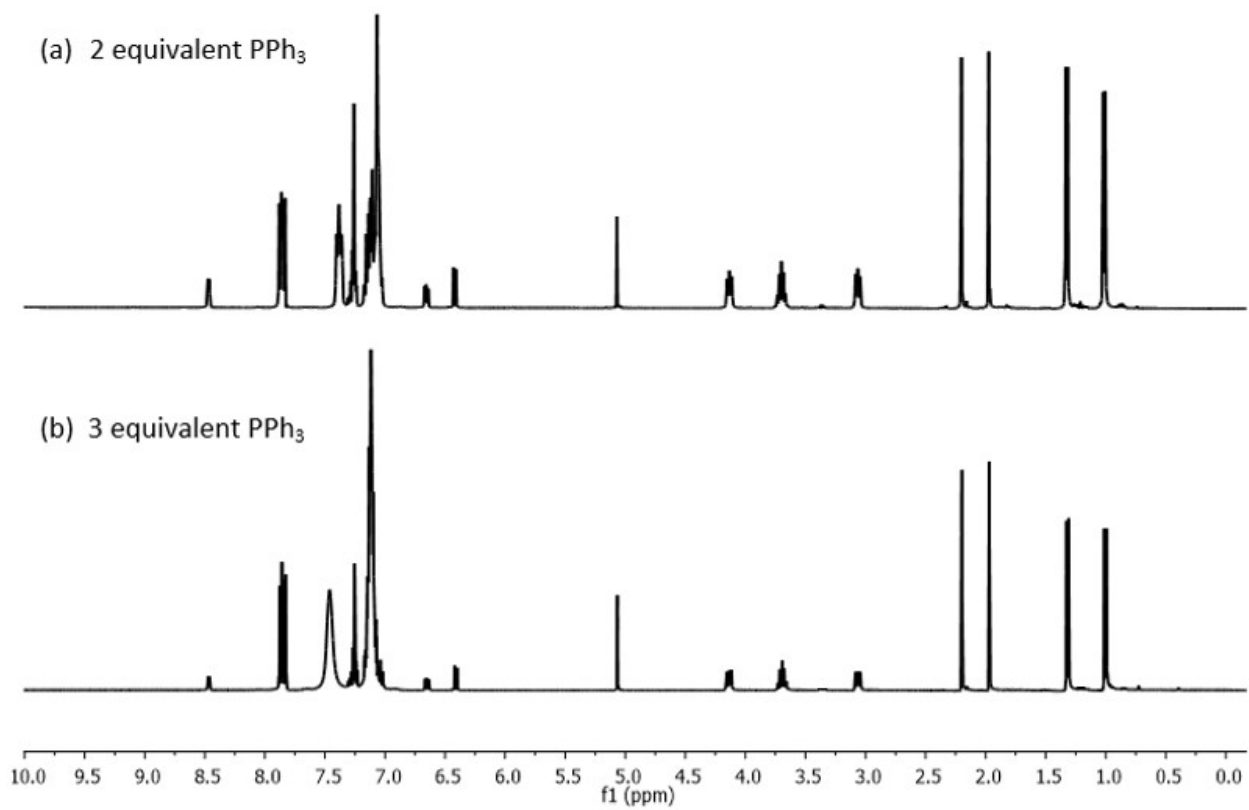

**Fig. S9** Comparison of <sup>1</sup>H NMR spectrum (400 MHz, C<sub>6</sub>D<sub>6</sub>) of L<sub>2</sub>Cu(O<sub>2</sub>N) with (a) two and (b) three equivalents of PPh<sub>3</sub>.

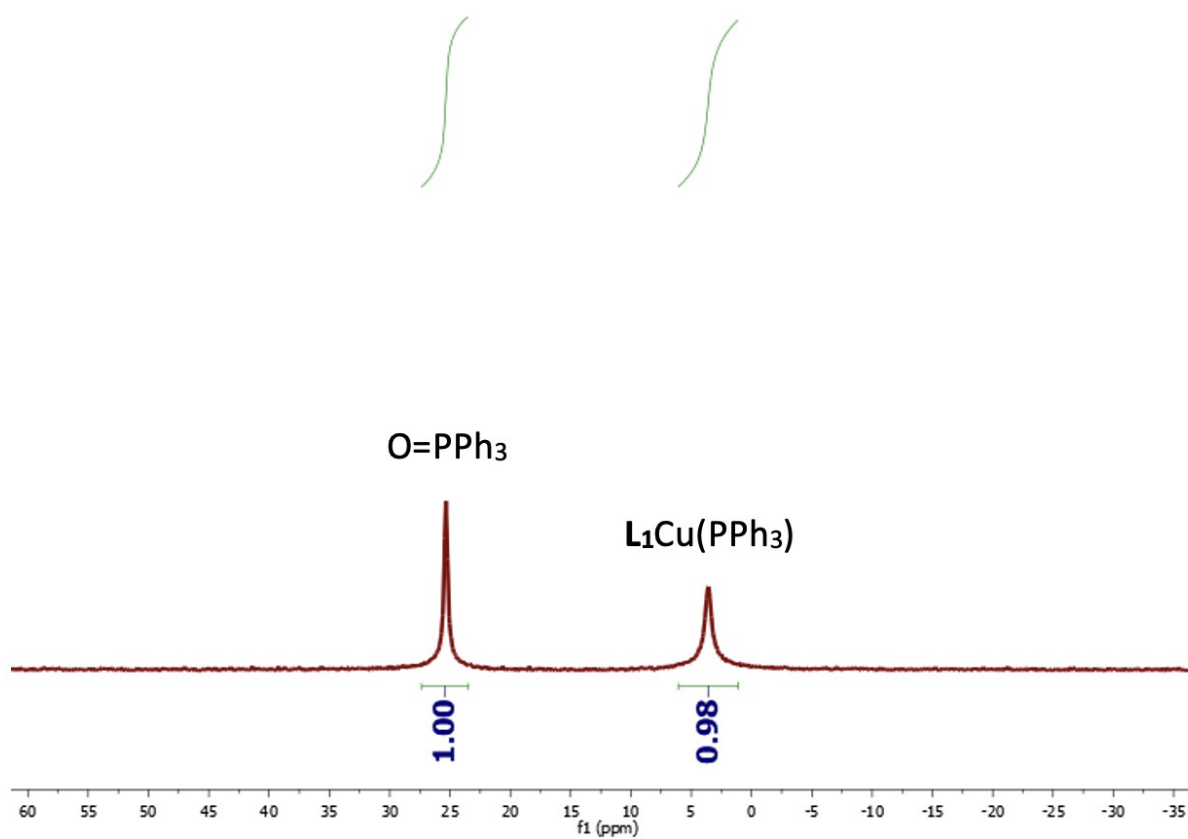

**Fig. S10**  $^{31}\text{P}$  NMR spectrum (400 MHz,  $\text{C}_6\text{D}_6$ ) of  $\text{L}_1\text{Cu(O}_2\text{N)}$  with two equivalents of  $\text{PPh}_3$ .

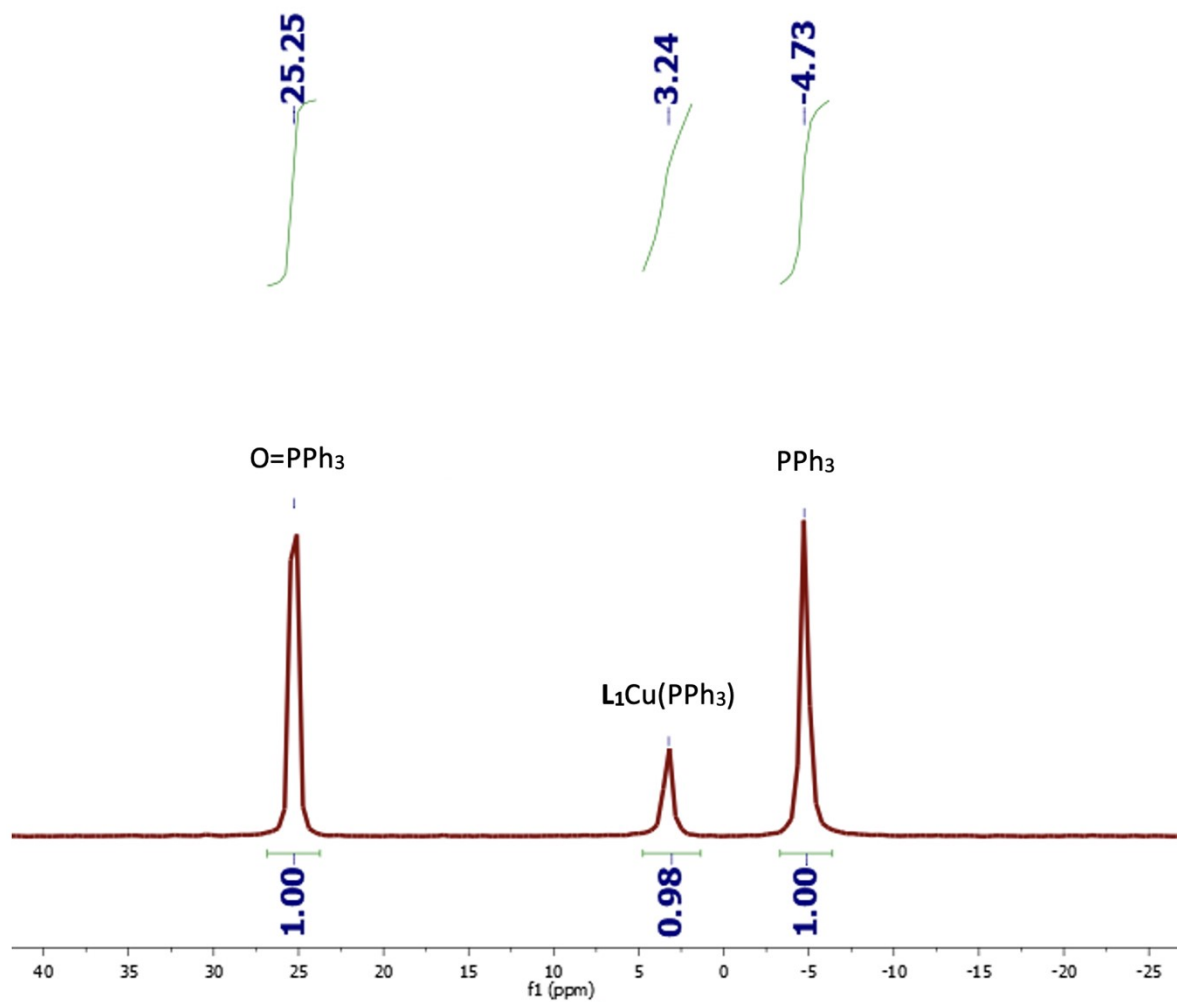

**Fig. S11**  $^{31}\text{P}$  NMR spectrum (400 MHz,  $\text{C}_6\text{D}_6$ ) of  $\text{L}_1\text{Cu}(\text{O}_2\text{N})$  with three equivalents of  $\text{PPh}_3$ .

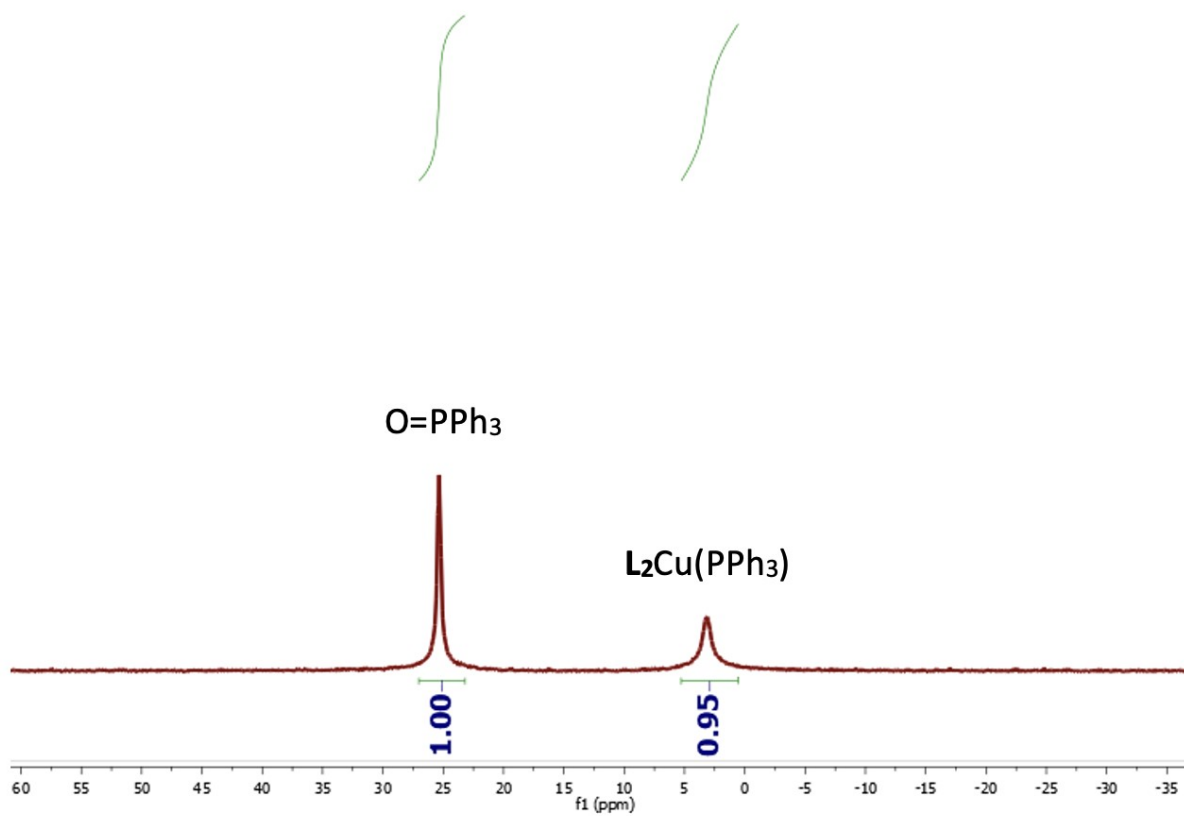

**Fig. S12**  $^{31}\text{P}$  NMR spectrum (400 MHz,  $\text{C}_6\text{D}_6$ ) of  $\text{L}_2\text{Cu(O}_2\text{N)}$  with two equivalents of  $\text{PPh}_3$ .

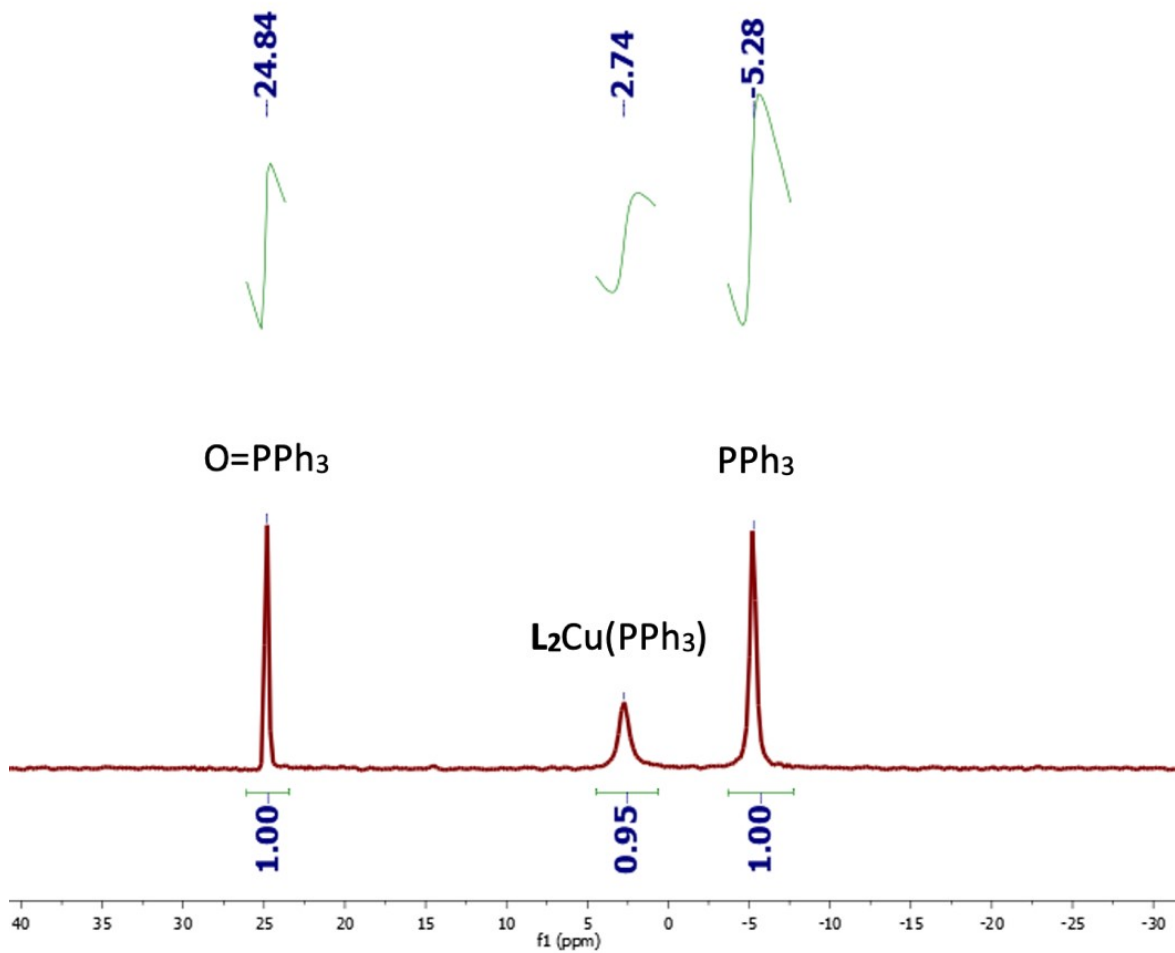

**Fig. S13**  $^{31}\text{P}$  NMR spectrum (400 MHz,  $\text{C}_6\text{D}_6$ ) of  $\text{L}_2\text{Cu}(\text{O}_2\text{N})$  with three equivalents of  $\text{PPh}_3$ .

**Quantitative NO release by (TPP)Co(II) complexes:** Nitric oxide production was quantified similarly to previously published procedures.<sup>1-7</sup> A solution of  $L_1Cu(O_2N)$  (9.16 mg, 20  $\mu$ mol) or  $L_2Cu(O_2N)$  (9.44 mg, 20  $\mu$ mol) in dichloromethane (1 mL) was prepared in a small vial capped with a rubber septum. A solution of  $PPh_3$  (10.5 mg, 80  $\mu$ mol) in dichloromethane (0.5 mL) was then introduced with a syringe at room temperature. The solution leads to gradual color change from dark brown  $L_1Cu(O_2N)$  and green  $L_2Cu(O_2N)$  to yellow within 5 minutes. Trapping of the evolved gas with the cobalt(II) porphyrin (TPP)Co(II) (TPP= tetraphenylporphyrin) leads to the formation of the corresponding complex (TPP)Co(NO) indicating a clear stoichiometric reduction of nitrite to NO in presence of  $PPh_3$ . NO is released in 91 % and

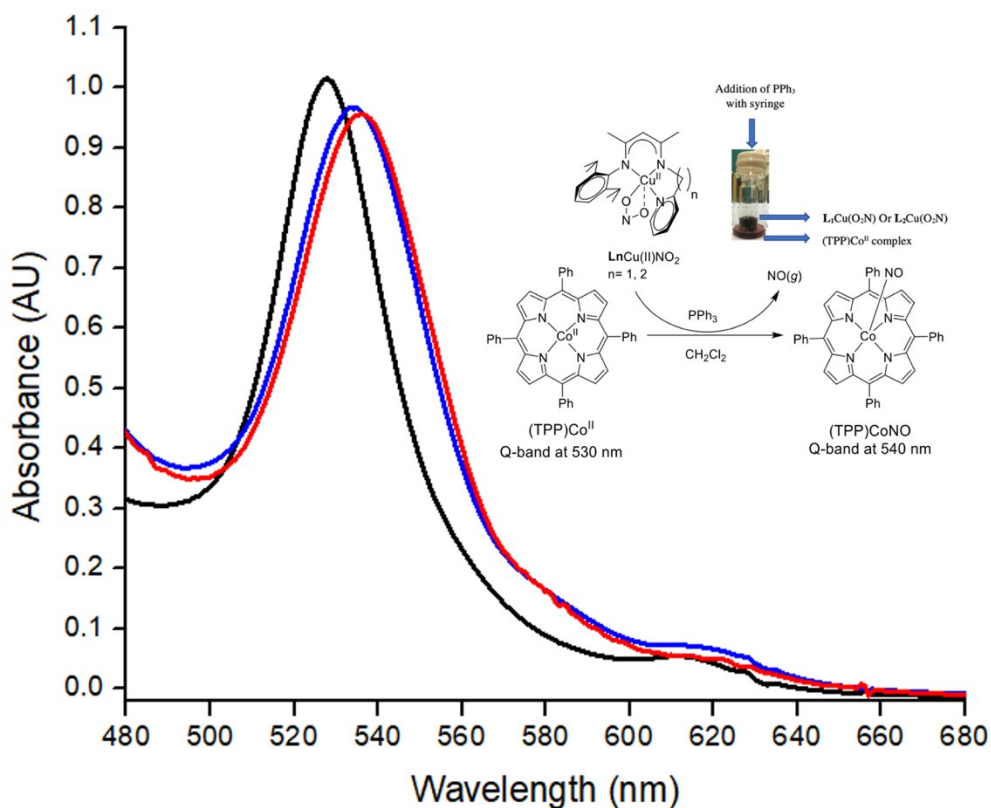

81% yield in case of  $L_1Cu(O_2N)$  and  $L_2Cu(O_2N)$  as measured by gas trapping experiment respectively.

**Fig. S14** UV-Vis. spectra (in  $\text{CH}_2\text{Cl}_2$  at 25 °C) of (TPP)Co (Black trace) and (TPP)Co(NO) species generated upon reacting (TPP)Co with NO released from the mixture of  $\text{L}_1\text{Cu}(\text{O}_2\text{N})$  (red),  $\text{L}_2\text{Cu}(\text{O}_2\text{N})$

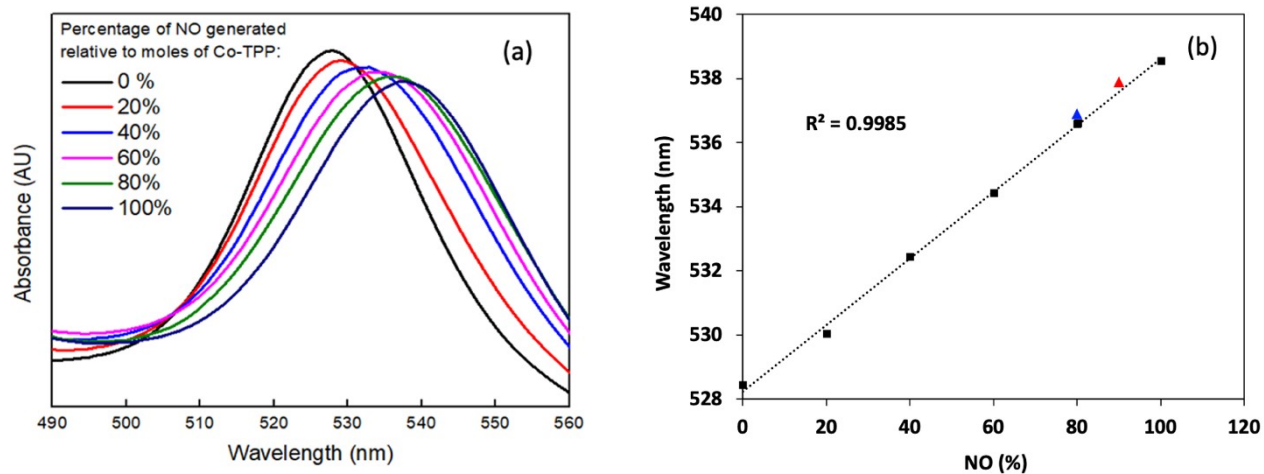

(blue) and  $\text{PPh}_3$ .

**Fig. S15** a) UV-vis spectra showing the shift in absorbance band of cobalt(II) porphyrin (TPP)Co(II) (TPP= tetraphenylporphyrin) with increasing level of complexation to NO. b) Calibration curve extracted from the peak maxima, showing the linear trend in absorption maximum shift with % complexation to NO. The spectra show  $\text{L}_1\text{Cu}(\text{O}_2\text{N})$  (red) and  $\text{L}_2\text{Cu}(\text{O}_2\text{N})$  (blue).<sup>7</sup>

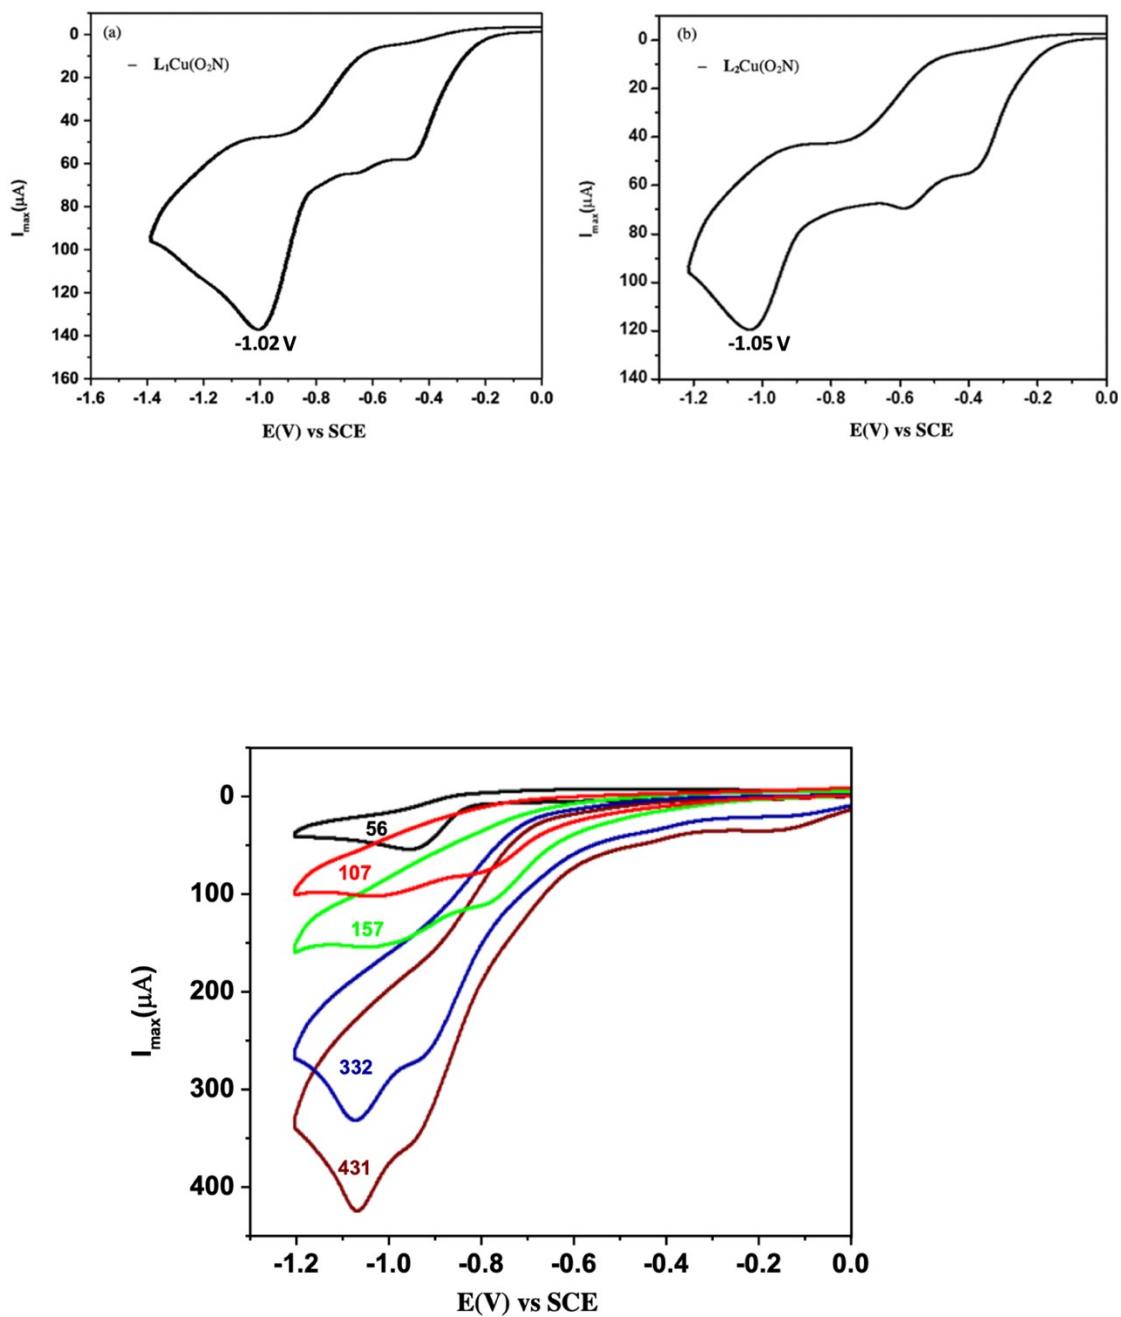

**Fig. S16** CV diagrams in MeCN ( $1 \times 10^{-3}$  M) at scan rate =  $300 \text{ mV s}^{-1}$  using electrolyte =  $(\text{Bu}_4\text{N})(\text{PF}_6)$  (0.1 M).  $L_1\text{Cu}(\text{O}_2\text{N})$  (a) and  $L_2\text{Cu}(\text{O}_2\text{N})$  (b) gradually developed -1.02~1.05 V response upon reduction, followed by  $\text{PPh}_3$  addition.

Note: Potentials are vs SCE (Ferrocene/Ferrocenium couple in  $\text{CH}_3\text{CN}$  solution,  $E_{1/2} = +400 \text{ mV}$ ).



**Fig. S17** CV of NO dissolved in 20 mL CH<sub>3</sub>CN solution containing (Bu<sub>4</sub>N)(PF<sub>6</sub>) as supporting electrolyte

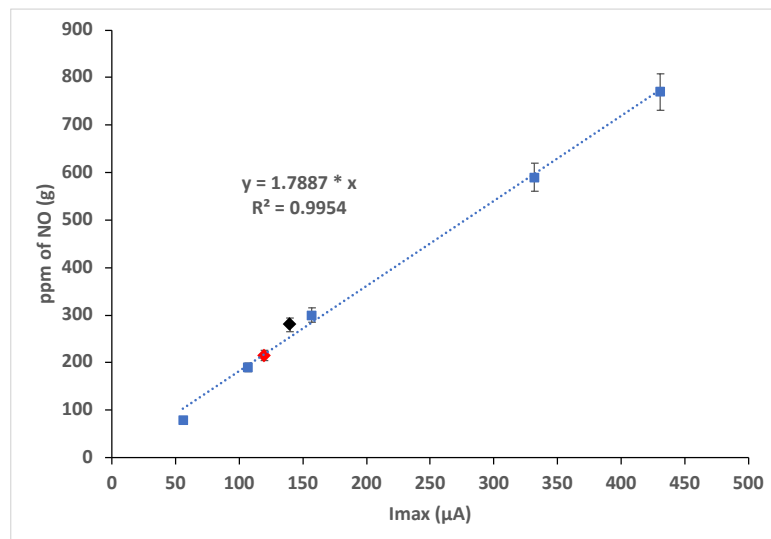

at 298 K at a glassy-carbon working electrode at a scan rate of 300 mV s<sup>-1</sup> using Ferrocene/Ferrocenium as reference electrode: [NO] are 0.7 ml (56 ppm), 1.5 ml (107 ppm), 3ml (157 ppm), 5 ml (332 ppm) and 7 ml (431 ppm); maximum ipc observed electrochemically are 79, 190, 300, 590 and 770 respectively.<sup>1,2</sup>

Note: Potentials are vs SCE (Ferrocene/Ferrocenium couple in CH<sub>3</sub>CN solution, E<sub>1/2</sub> = + 400 mV).

**Fig. S18** Standardization plot of [NO(g)]. The ppm of NO for complexes L<sub>1</sub>Cu(O<sub>2</sub>N) (black) and L<sub>2</sub>Cu(O<sub>2</sub>N) (red) has been presented.

**Calculation for liberated NO(g) from reaction of reduced L<sub>1</sub>Cu(O<sub>2</sub>N) in 20 mL CH<sub>3</sub>CN with PPh<sub>3</sub>:**

Imax(µA) obtained at - 0.97 V (the reduced CH<sub>3</sub>CN solution of L<sub>1</sub>Cu(O<sub>2</sub>N) (0.98 mmol) + PPh<sub>3</sub>) = 135 (Fig. S4a). From the slope of the calibration plot (Fig. S6) this Imax correspond to 1.788 x 135 = 241.38 ppm of NO(g) that is liberated from a 0.98 mmol CH<sub>3</sub>CN solution (20 mL) of reduced L<sub>1</sub>Cu(O<sub>2</sub>N).

F.Wt. of L<sub>1</sub>Cu(O<sub>2</sub>N) = 458.07

458.07 mg of L<sub>1</sub>Cu(O<sub>2</sub>N) in 1L CH<sub>3</sub>CN = 30 gm of NO(g) in 1 L = 3 x 10<sup>4</sup> ppm of NO(g) [1 ppm = 1 mg/L], Therefore (458.07 x 20) / 1000 mg i.e., 9.16 mg of L<sub>1</sub>Cu(O<sub>2</sub>N) in 20 mL = (30 x 20) / 1000 mg i.e., 0.45 mg NO(g) in 20 mL = 30 ppm NO(g) = 100% NO(g) evolution

9.0 mg of L<sub>1</sub>Cu(O<sub>2</sub>N) is dissolved in 20 mL of CH<sub>3</sub>CN (0.98 mmol) = (30 x 9.0) / 9.16 i.e., 29.47 \* 3 = 88.41 ppm NO(g) for 100% NO(g) evolution.

If 88.41 ppm NO(g) liberates then it will be 100% NO(g) evolution, however the liberated amount of NO(g) is 241.38

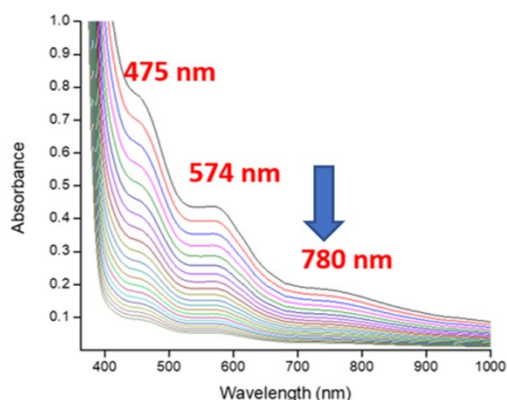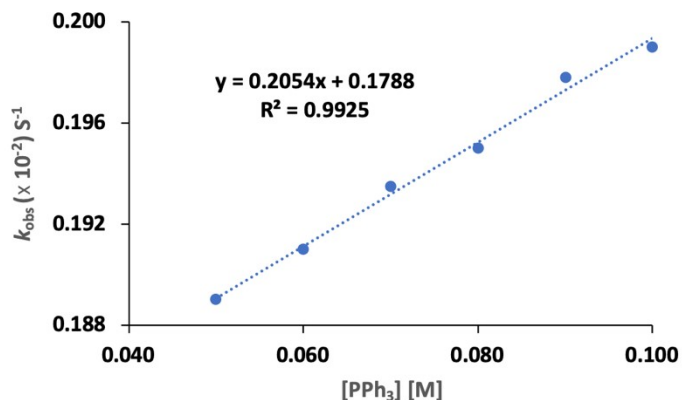

ppm. Therefore yield % NO(g) evolution =  $(241.38 \times 100) / 88.41 = 273.02 / 3 = 91 \pm 1.45 \%$

After similar calculation for  $L_2Cu(O_2N)$  the NO release yield was found to be  $81 \pm 0.32 \%$ .

Note: A three times higher concentration of  $L_1Cu(O_2N)$  and  $L_2Cu(O_2N)$  has been used in the experiment for calibration

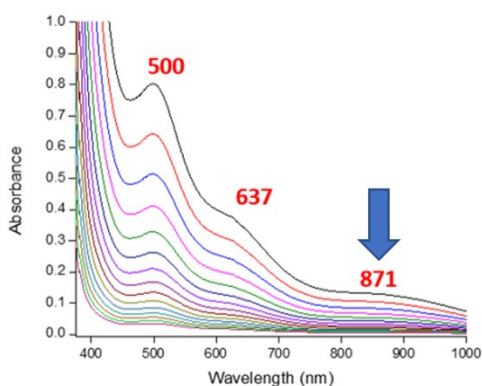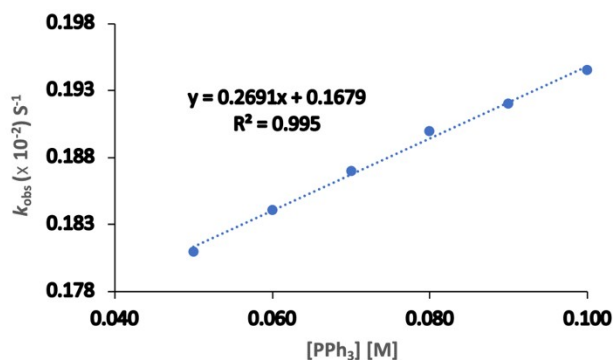

curve (Fig. S6).

**Fig. S19** Reaction of  $L_1Cu(O_2N)$  with excess of  $PPh_3$  (25~50 equivalents) in  $CH_2Cl_2$  at 25 °C.

**Fig. S20** Reaction of  $L_2Cu(O_2N)$  with excess of  $PPh_3$  (25~50 equivalents) in  $CH_2Cl_2$  at 25 °C.

**Establishing Rate Law with  $L_1Cu(O_2N)$  or  $L_2Cu(O_2N)$ :** The following stock solutions were prepared at 25 °C between experiments: 2.0 mM  $L_1Cu(O_2N)$  or  $L_2Cu(O_2N)$  and 20.0 mM  $PPh_3$  in dichloromethane. Reactions were conducted in a UV-Vis cuvette: 2 mL of the copper solution was transferred to a cuvette under nitrogen environment

and sealed with a septum which maintained a steady dark brown color. 0.12 – 0.25 mL (25, 30, 40, 45 and 50 eq.) of the phosphine solution was drawn into a syringe also under nitrogen environment. The cuvette was placed in the UV-

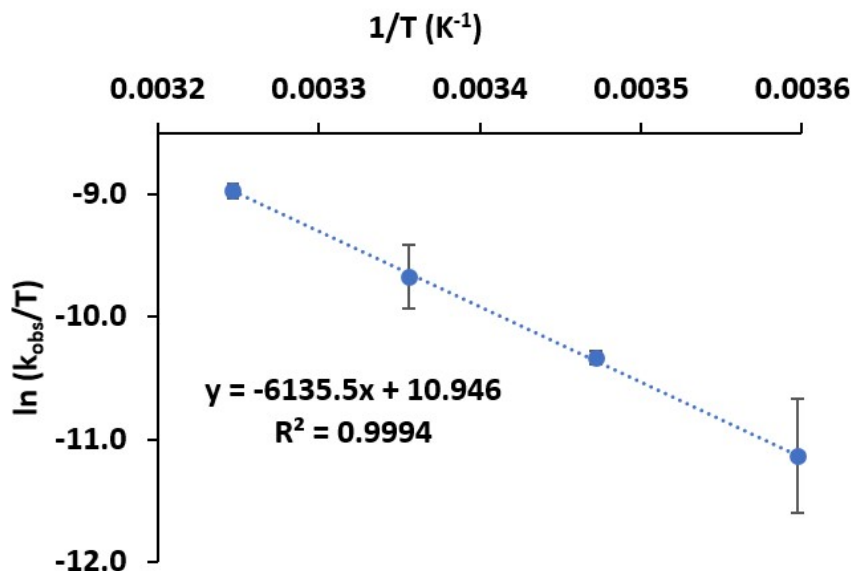

vis at temperature 25 °C. The solution was allowed to stir for ~3 min to allow the temperature to be uniform. After ~30 s collection the phosphine solution was injected. The drop of the peak at ~780 nm ( $\text{L}_1\text{Cu}(\text{O}_2\text{N})$ ) and ~871 nm ( $\text{L}_2\text{Cu}(\text{O}_2\text{N})$ ) was followed after the injection of the phosphine solution. The final color of the solution was yellow.

**Fig. S21** Eyring plot for the reaction of  $\text{L}_1\text{Cu}(\text{O}_2\text{N})$  with two equivalents of  $\text{PPh}_3$ .

**Eyring analysis of copper(II) nitrite complexes:** The following stock solutions were prepared at 25 °C between experiments: 2.0 mM  $\text{L}_1\text{Cu}(\text{O}_2\text{N})$  or  $\text{L}_2\text{Cu}(\text{O}_2\text{N})$  and 4.0 mM  $\text{PPh}_3$  in dichloromethane. Reactions were conducted in a UV-Vis cuvette: 2 mL of the copper solution was transferred to a cuvette inside the glove box and sealed with a septum which maintained a steady dark brown color that varied slightly with the different complexes. 0.1 mL (2 eq.) of the phosphine solution was drawn into a syringe inside the glove box as well. The cuvette was placed in the UV-vis equipped with the cryostat set to maintain the temperature. The solution was allowed to stir for ~5 min to allow the temperature to be uniform. After ~30 s collection the phosphine was injected. The drop of the peak at ~780 nm ( $\text{L}_1\text{Cu}(\text{O}_2\text{N})$ ) and 871 nm ( $\text{L}_2\text{Cu}(\text{O}_2\text{N})$ ) were followed after the injection of the phosphine solution. The final color of the solution was yellow. For  $\text{L}_1\text{Cu}(\text{O}_2\text{N})$  and  $\text{L}_2\text{Cu}(\text{O}_2\text{N})$  the temperatures used were 278-308 K. Plotting the  $\ln(k/T)$  as function of  $1/T$  according to the Eyring equation yielded activation enthalpy and activation entropy.

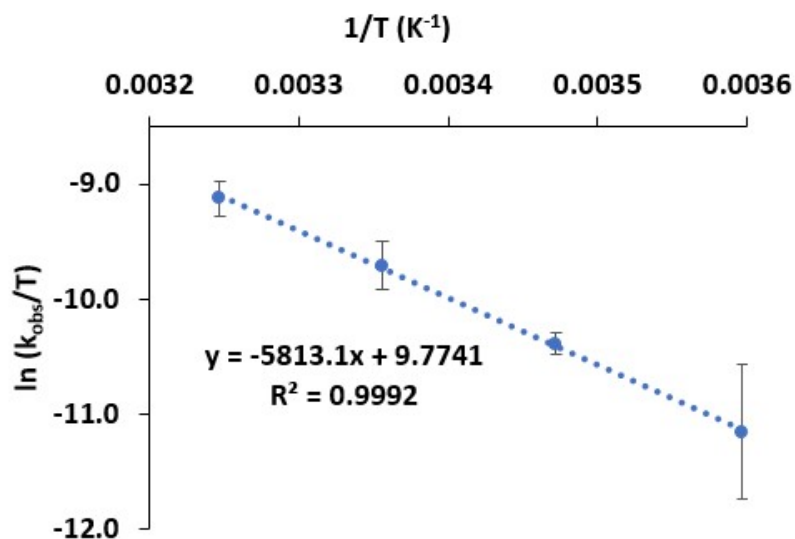

**Fig. S22** Eyring plot for the reaction of  $L_2Cu(O_2N)$  with two equivalents of  $PPh_3$ .

**Calculation of the Activation Parameters:**<sup>3</sup> The Eyring plot for each compound allows for the use of the Eyring equation:

$$\ln \frac{k}{T} = \frac{-\Delta H^\ddagger}{T} \cdot \frac{1}{T} + \ln \frac{k_B}{h} + \frac{-\Delta S^\ddagger}{R}$$

to calculate the activation parameters, where  $k$  is the rate constant ( $M^{-1}s^{-1}$ ),  $T$  is the temperature (K),  $\Delta H^\ddagger$  is the enthalpy of activation (J/mol),  $R$  is the gas constant (J/K•mol),  $k_B$  is the Boltzmann constant (J/K),  $h$  is the Planck constant (J•s), and  $\Delta S^\ddagger$  is the entropy of activation (J/mol•K). The equation of the line from the Eyring plot fits the form of the equation such that the slope of the line is equal to  $-\Delta H^\ddagger/R$  and the intercept of the line is equal

to  $\Delta S^\ddagger/R - \ln \frac{k_B}{h}$ . The values for  $\Delta H^\ddagger$  and  $\Delta S^\ddagger$  were then converted to kcal/mol and cal/mol•K respectively. To calculate the Gibbs free energy of activation ( $-\Delta G^\ddagger$ ) at 298 K the equation:

$$\Delta G^\ddagger = \Delta H^\ddagger - T\Delta S^\ddagger$$

was used with T = 298 K. The standard error in the slope and intercept were calculated using the Microsoft Excel linest function and carried through the calculations to arrive at the errors in the activation parameters.

**Table S1** The experimental and calculated metric parameters of  $L_1CuCl$  and  $L_2CuCl$ .

|                | Cu-N <sub>1(py)</sub> | Cu-N <sub>2</sub> | Cu-N <sub>3</sub> | Cu-Cl | N <sub>1</sub> -Cu-N <sub>3</sub> | N <sub>2</sub> -Cu-Cl | $\tau_4$ |
|----------------|-----------------------|-------------------|-------------------|-------|-----------------------------------|-----------------------|----------|
| Exp- $L_1CuCl$ | 2.044                 | 1.969             | 1.940             | 2.251 | 169.4                             | 167.4                 | 0.164    |
| Exp- $L_2CuCl$ | 2.020                 | 1.938             | 1.931             | 2.236 | 148.1                             | 146.6                 | 0.463    |
| DFT- $L_1CuCl$ | 2.072                 | 1.963             | 1.973             | 2.255 | 162.0                             | 160.6                 | 0.265    |
| DFT- $L_2CuCl$ | 2.066                 | 1.972             | 1.965             | 2.256 | 147.6                             | 148.7                 | 0.451    |

**Table S2** The overlap population analysis between Cu and coordinated donor atoms for the  $\beta$ -LUMOs of  $L_1CuCl$  and  $L_2CuCl$ .

|                            | Cu-Cl  | Cu-N <sub>1(py)</sub> | Cu-N <sub>L1/L2</sub> | Orbital energy (eV) |
|----------------------------|--------|-----------------------|-----------------------|---------------------|
| $\beta$ -LUMO of $L_1CuCl$ | -0.052 | -0.078                | -0.132                | -2.466              |
| $\beta$ -LUMO of $L_2CuCl$ | -0.045 | -0.053                | -0.117                | -2.534              |

**Table S3** First order rate constants for reaction of copper(II) nitrito complexes (2 mM) with triphenylphosphine (4 mM) in  $CH_2Cl_2$  at 278-308 K.

| Temperature (K)                                              | $k_{obs}$ (s <sup>-1</sup> )     |                                  |
|--------------------------------------------------------------|----------------------------------|----------------------------------|
|                                                              | $L_1Cu(O_2N)$                    | $L_2Cu(O_2N)$                    |
| 278                                                          | $(4.06 \pm 0.47) \times 10^{-3}$ | $(3.97 \pm 0.11) \times 10^{-3}$ |
| 288                                                          | $(9.39 \pm 0.05) \times 10^{-3}$ | $(8.85 \pm 0.25) \times 10^{-3}$ |
| 298                                                          | $(1.89 \pm 0.26) \times 10^{-2}$ | $(1.81 \pm 0.48) \times 10^{-2}$ |
| 308                                                          | $(3.93 \pm 0.05) \times 10^{-2}$ | $(3.36 \pm 0.42) \times 10^{-2}$ |
| $\Delta H^\ddagger$ (kcal mol <sup>-1</sup> )                | 12.19 $\pm$ 0.14                 | 11.55 $\pm$ 0.16                 |
| $\Delta S^\ddagger$ (cal K <sup>-1</sup> mol <sup>-1</sup> ) | -78.24 $\pm$ 2.61                | -69.86 $\pm$ 1.46                |
| $\Delta G^\ddagger$ (kcal mol <sup>-1</sup> )                | 18.67 $\pm$ 1.04                 | 16.94 $\pm$ 0.34                 |

**Table S4.** Values of  $E_{1/2}$  for Cu(II) complexes.

| Complexes                            | $E_a$  | $E_c$  | $E_{1/2}$ (V) | $\Delta E$ (V) | ref       |
|--------------------------------------|--------|--------|---------------|----------------|-----------|
| $L_A\text{Cu}(\text{O}_2\text{N})^c$ | -0.370 | -0.470 | -0.420        | 0.099          | 4         |
| $L_B\text{Cu}(\text{O}_2\text{N})^b$ | -0.046 | -0.179 | -0.113        | 0.133          | 3         |
| $L_1\text{CuCl}^a$                   | -0.092 | -0.240 | -0.166        | 0.148          | this work |
| $L_2\text{CuCl}^a$                   | +0.140 | -0.032 | -0.054        | 0.108          | this work |
| $L_3\text{CuCl}^a$                   | -0.152 | -0.362 | -0.257        | 0.210          | this work |
| $L_4\text{CuCl}^a$                   | +0.060 | -0.142 | -0.041        | 0.082          | this work |
| $L_1\text{Cu}(\text{O}_2\text{N})^a$ | -0.099 | -0.255 | -0.177        | 0.156          | this work |
| $L_2\text{Cu}(\text{O}_2\text{N})^a$ | +0.059 | +0.194 | +0.126        | 0.135          | this work |

<sup>a</sup> All values reported vs NHE, by adding 400 mV to the value measured vs the SCE couple in  $\text{CH}_3\text{CN}$  with  $\text{Bu}_4\text{NPF}_6$  as electrolyte and potentials (in V vs. SCE) were measured at a glassy carbon electrode at a scan rate of  $300 \text{ mVs}^{-1}$ .

<sup>b</sup>  $L_B = (2,6\text{-dimethyl})\text{phenylamino-4-(2,6-dimethyl)phenyliminopent-2-ene}$ . CV measured in THF using NHE as reference electrode.

<sup>c</sup>  $L_A = 1,1,1,5,5,5\text{-Hexafluoro-2-(2,6-diisopropyl)phenylamino-4-(2,6-diisopropyl)phenyliminopent-2-ene}$ . CV measured in THF using NHE as reference electrode.

**Table S5.** DFT optimized result: atomic coordinates of  $L_1CuCl$ .

---

| Center<br>Number | Atomic<br>Number | Atomic<br>Type | Coordinates (Angstroms) |          |          |
|------------------|------------------|----------------|-------------------------|----------|----------|
|                  |                  |                | X                       | Y        | Z        |
| 1                | 29               | 0              | -0.83963                | 0.01529  | -0.38958 |
| 2                | 17               | 0              | -0.05210                | -1.73376 | -1.57516 |
| 3                | 7                | 0              | -2.74219                | -0.80375 | -0.36365 |
| 4                | 7                | 0              | -1.85366                | 1.63088  | 0.07573  |
| 5                | 7                | 0              | 0.89180                 | 0.75968  | 0.19564  |
| 6                | 6                | 0              | -3.05219                | -2.09678 | -0.51371 |
| 7                | 6                | 0              | -4.36142                | -2.54615 | -0.48397 |
| 8                | 6                | 0              | -5.38079                | -1.61421 | -0.30800 |
| 9                | 6                | 0              | -5.05359                | -0.27564 | -0.16038 |
| 10               | 6                | 0              | -3.71128                | 0.09532  | -0.18771 |
| 11               | 6                | 0              | -3.28724                | 1.52363  | -0.03019 |
| 12               | 6                | 0              | -2.21365                | 3.97912  | 0.67287  |
| 13               | 6                | 0              | -1.32124                | 2.78586  | 0.45366  |
| 14               | 6                | 0              | 0.03892                 | 2.96325  | 0.70044  |
| 15               | 6                | 0              | 1.05254                 | 1.98917  | 0.65170  |
| 16               | 6                | 0              | 2.37947                 | 2.40062  | 1.23887  |
| 17               | 6                | 0              | 0.19287                 | -2.05645 | 2.38223  |
| 18               | 6                | 0              | 1.85214                 | -0.94838 | 3.90360  |
| 19               | 6                | 0              | 1.18986                 | -0.90588 | 2.52963  |
| 20               | 6                | 0              | 2.18315                 | -0.93265 | 1.38464  |
| 21               | 6                | 0              | 3.26954                 | -1.80587 | 1.41970  |
| 22               | 6                | 0              | 4.16135                 | -1.88125 | 0.35870  |
| 23               | 6                | 0              | 3.96186                 | -1.09300 | -0.76637 |
| 24               | 6                | 0              | 3.66427                 | 1.74939  | -2.22178 |
| 25               | 6                | 0              | 2.74887                 | -0.27186 | -3.37760 |
| 26               | 6                | 0              | 2.66888                 | 0.59240  | -2.12095 |

---



|    |   |   |          |          |          |
|----|---|---|----------|----------|----------|
| 27 | 6 | 0 | 2.87824  | -0.22016 | -0.85788 |
| 28 | 6 | 0 | 2.00436  | -0.13381 | 0.24101  |
| 29 | 1 | 0 | -2.20214 | -2.75784 | -0.67916 |
| 30 | 1 | 0 | -4.57454 | -3.60507 | -0.60308 |
| 31 | 1 | 0 | -6.42200 | -1.93092 | -0.28513 |
| 32 | 1 | 0 | -5.82044 | 0.48517  | -0.02087 |
| 33 | 1 | 0 | -3.80674 | 1.93472  | 0.85417  |
| 34 | 1 | 0 | -3.67962 | 2.09340  | -0.89521 |
| 35 | 1 | 0 | -2.84280 | 4.17684  | -0.20562 |
| 36 | 1 | 0 | -2.89183 | 3.82112  | 1.52356  |
| 37 | 1 | 0 | -1.62565 | 4.87806  | 0.87894  |
| 38 | 1 | 0 | 0.34105  | 3.95032  | 1.04082  |
| 39 | 1 | 0 | 2.44983  | 3.48923  | 1.33049  |
| 40 | 1 | 0 | 2.48123  | 1.97019  | 2.24612  |
| 41 | 1 | 0 | 3.23099  | 2.03111  | 0.65867  |
| 42 | 1 | 0 | 0.71189  | -3.02393 | 2.44766  |
| 43 | 1 | 0 | -0.56845 | -2.02294 | 3.17464  |
| 44 | 1 | 0 | -0.31162 | -2.02857 | 1.40520  |
| 45 | 1 | 0 | 2.61651  | -0.16689 | 4.01289  |
| 46 | 1 | 0 | 1.10187  | -0.80546 | 4.69307  |
| 47 | 1 | 0 | 2.33731  | -1.91600 | 4.09416  |
| 48 | 1 | 0 | 0.62020  | 0.03417  | 2.46837  |
| 49 | 1 | 0 | 3.42120  | -2.43971 | 2.29361  |
| 50 | 1 | 0 | 5.00934  | -2.56316 | 0.40486  |
| 51 | 1 | 0 | 4.65709  | -1.16820 | -1.60286 |
| 52 | 1 | 0 | 3.51691  | 2.30388  | -3.15909 |
| 53 | 1 | 0 | 3.56184  | 2.46448  | -1.39475 |
| 54 | 1 | 0 | 4.69923  | 1.37643  | -2.21533 |
| 55 | 1 | 0 | 2.06815  | -1.12845 | -3.30745 |
| 56 | 1 | 0 | 2.47121  | 0.32122  | -4.25990 |
| 57 | 1 | 0 | 3.76823  | -0.64737 | -3.54896 |

|    |   |   |         |         |          |
|----|---|---|---------|---------|----------|
| 58 | 1 | 0 | 1.65545 | 1.01688 | -2.07951 |
|----|---|---|---------|---------|----------|

---

**Table S6.** DFT optimized result: atomic coordinates of  $L_2CuCl$ .

| Center<br>Number | Atomic<br>Number | Atomic<br>Type | Coordinates (Angstroms) |          |          |
|------------------|------------------|----------------|-------------------------|----------|----------|
|                  |                  |                | X                       | Y        | Z        |
| 1                | 29               | 0              | 0.77276                 | 0.21291  | -0.25735 |
| 2                | 17               | 0              | 0.22506                 | -1.10614 | -2.00367 |
| 3                | 7                | 0              | 2.63899                 | -0.67237 | -0.21485 |
| 4                | 7                | 0              | 1.54045                 | 1.90551  | 0.40098  |
| 5                | 7                | 0              | -0.96739                | 0.45771  | 0.62137  |
| 6                | 6                | 0              | 2.81239                 | -1.92295 | 0.21207  |
| 7                | 6                | 0              | 4.04622                 | -2.55387 | 0.17369  |
| 8                | 6                | 0              | 5.12723                 | -1.85148 | -0.34668 |
| 9                | 6                | 0              | 4.93596                 | -0.55589 | -0.80739 |
| 10               | 6                | 0              | 3.66581                 | 0.01087  | -0.73284 |
| 11               | 6                | 0              | 3.35610                 | 1.39317  | -1.21249 |
| 12               | 6                | 0              | 2.84687                 | 2.30021  | -0.09644 |
| 13               | 6                | 0              | 1.75927                 | 3.77492  | 1.96895  |
| 14               | 6                | 0              | 1.00822                 | 2.60174  | 1.39440  |
| 15               | 6                | 0              | -0.24254                | 2.32670  | 1.96200  |
| 16               | 6                | 0              | -1.18156                | 1.36432  | 1.56060  |
| 17               | 6                | 0              | -2.52326                | 1.42118  | 2.24553  |
| 18               | 6                | 0              | -2.31945                | 1.60883  | -2.72380 |
| 19               | 6                | 0              | -4.13633                | 2.44015  | -1.20394 |
| 20               | 6                | 0              | -2.83702                | 1.64144  | -1.28563 |
| 21               | 6                | 0              | -2.98157                | 0.22987  | -0.75124 |

|    |   |   |          |          |          |
|----|---|---|----------|----------|----------|
| 22 | 6 | 0 | -4.02177 | -0.57518 | -1.21289 |
| 23 | 6 | 0 | -4.15418 | -1.89266 | -0.79660 |
| 24 | 6 | 0 | -3.22371 | -2.43218 | 0.07993  |
| 25 | 6 | 0 | -1.72713 | -2.55980 | 2.86686  |
| 26 | 6 | 0 | -0.56819 | -3.59372 | 0.88730  |
| 27 | 6 | 0 | -1.13919 | -2.30706 | 1.47979  |
| 28 | 6 | 0 | -2.15604 | -1.67223 | 0.55463  |
| 29 | 6 | 0 | -2.05657 | -0.32871 | 0.15177  |
| 30 | 1 | 0 | 1.92012  | -2.42830 | 0.58303  |
| 31 | 1 | 0 | 4.14897  | -3.57425 | 0.53298  |
| 32 | 1 | 0 | 6.11146  | -2.31325 | -0.40068 |
| 33 | 1 | 0 | 5.75678  | 0.01728  | -1.23425 |
| 34 | 1 | 0 | 4.25543  | 1.84355  | -1.65296 |
| 35 | 1 | 0 | 2.59695  | 1.33104  | -2.00952 |
| 36 | 1 | 0 | 2.80410  | 3.32716  | -0.49800 |
| 37 | 1 | 0 | 3.60228  | 2.31246  | 0.71126  |
| 38 | 1 | 0 | 1.19009  | 4.25536  | 2.76980  |
| 39 | 1 | 0 | 2.73054  | 3.46737  | 2.38041  |
| 40 | 1 | 0 | 1.96641  | 4.53216  | 1.20038  |
| 41 | 1 | 0 | -0.55285 | 2.98215  | 2.77201  |
| 42 | 1 | 0 | -2.91428 | 0.41791  | 2.45292  |
| 43 | 1 | 0 | -2.45989 | 1.98378  | 3.18268  |
| 44 | 1 | 0 | -3.26379 | 1.91875  | 1.60393  |
| 45 | 1 | 0 | -2.16439 | 2.62879  | -3.10379 |
| 46 | 1 | 0 | -1.37468 | 1.05430  | -2.79060 |
| 47 | 1 | 0 | -3.04316 | 1.10942  | -3.38445 |
| 48 | 1 | 0 | -4.90399 | 2.03539  | -1.87841 |
| 49 | 1 | 0 | -4.55968 | 2.44321  | -0.18951 |
| 50 | 1 | 0 | -3.96272 | 3.48282  | -1.50292 |
| 51 | 1 | 0 | -2.08332 | 2.16839  | -0.68140 |
| 52 | 1 | 0 | -4.74086 | -0.16345 | -1.92172 |

|    |   |   |          |          |          |
|----|---|---|----------|----------|----------|
| 53 | 1 | 0 | -4.97761 | -2.50284 | -1.16492 |
| 54 | 1 | 0 | -3.32284 | -3.47155 | 0.39517  |
| 55 | 1 | 0 | -2.58466 | -3.24591 | 2.81008  |
| 56 | 1 | 0 | -0.98050 | -3.01275 | 3.53439  |
| 57 | 1 | 0 | -2.07690 | -1.62936 | 3.33479  |
| 58 | 1 | 0 | -0.17922 | -3.41793 | -0.12552 |
| 59 | 1 | 0 | 0.24083  | -3.98503 | 1.52304  |
| 60 | 1 | 0 | -1.32991 | -4.38327 | 0.82053  |
| 61 | 1 | 0 | -0.30654 | -1.59546 | 1.59883  |

---

## References:

1. Maji, R. C.; Barman, S. K.; Roy, S.; Chatterjee, S. K.; Bowles, F. L.; Olmstead, M. M.; Patra, A. K., Copper complexes relevant to the catalytic cycle of copper nitrite reductase: electrochemical detection of NO (g) evolution and flipping of NO<sub>2</sub> binding mode upon Cu<sup>II</sup>→ Cu<sup>I</sup> reduction. *Inorg. Chem.* **2013**, *52*, 11084-11095.
2. Chandra Maji, R.; Mishra, S.; Bhandari, A.; Singh, R.; Olmstead, M. M.; Patra, A. K., A Copper (II) Nitrite That Exhibits Change of Nitrite Binding Mode and Formation of Copper (II) Nitrosyl Prior to Nitric Oxide Evolution. *Inorg. Chem.* **2018**, *57*, 1550-1561.
3. Stauffer, M.; Sakhaei, Z.; Greene, C.; Ghosh, P.; Bertke, J. A.; Warren, T. H., Mechanism of O-Atom Transfer from Nitrite: Nitric Oxide Release at Copper(II). *Inorg. Chem.* **2021**, *60*, 15968–15974.
4. Sakhaei, Z.; Kundu, S.; Donnelly, J. M.; Bertke, J. A.; Kim, W. Y.; Warren, T. H., Nitric oxide release via oxygen atom transfer from nitrite at copper (II). *Chem. Commun.* **2017**, *53*, 549-552.
5. Sanders, B. C.; Hassan, S. M.; Harrop, T. C., NO<sub>2</sub><sup>-</sup> Activation and Reduction to NO by a Nonheme Fe(NO<sub>2</sub>)<sub>2</sub> Complex. *J. Am. Chem. Soc.* **2014**, *136*, 10230-10233.
6. Kumar, M.; Dixon, N. A.; Merkle, A. C.; Zeller, M.; Lehnert, N.; Papish, E. T., Hydrotris(triazolyl)borate Complexes as Functional Models for Cu Nitrite Reductase: The Electronic Influence of Distal Nitrogens. *Inorg. Chem.* **2012**, *51*, 7004-7006.
7. Cioncoloni, G.; Roger, I.; Wheatley, P. S.; Wilson, C.; Morris, R. E.; Sproules, S.; Symes, M. D., Proton-coupled electron transfer enhances the electrocatalytic reduction of nitrite to NO in a bioinspired copper complex. *ACS Catal* **2018**, *8*, 5070-5084.
